# Supplementary material for: Multiomics Study of Key Differentially Expressed Methylation Genes in HCC Based on Epigenome and Transcriptome Analyses
Source: Research Square preprint supplement (doi:10.21203/rs.3.rs-439115/v1), 2021-05-11
Supplement: Supplementary file 1 [file 3562dccf1c123a51801219ac.xlsx]

## Sheet: Sheet1
AARS2
ABHD3
ACACB
ACAN
ACTR3
ADAM11
ADAMTS8
ADAP1
ADARB2
AHRR
AK3L1
AKAP8L
ALDH1A3
AMPD3
ANAPC4
ANO2
ANXA2
APITD1
APOL6
ARHGAP24
ARHGAP25
ARHGDIB
ARHGEF2
ASCC2
ASPG
ASTN2
ATP5E
B4GALNT3
BASP1
BCR
BLK
BPHL
BST2
BTNL9
C10orf53
C10orf84
C17orf28
C19orf39
C19orf59
C1orf105
C1orf107
C1orf150
C1orf187
C20orf197
C20orf94
C2CD4D
C3orf52
C4BPA
C4BPB
C5orf37
C6orf48
C6orf57
C9orf103
C9orf171
C9orf3
CA10
CACNA1C
CACNA1E
CACNA1I
CACNA2D4
CACNB2
CALN1
CAMTA1
CCDC64B
CCDC80
CCHCR1
CCR2
CCRL2
CD274
CD300E
CD300LD
CD33
CD53
CD6
CD68
CD93
CDH18
CDH22
CDKN1B
CEP135
CES3
CHD3
CLEC11A
CLEC3B
CLEC4D
CLIC1
CLNK
CMKLR1
COL13A1
COL20A1
COL21A1
COL4A1
COL5A1
COPS4
CPAMD8
CPNE4
CPT1A
CRTAM
CSMD1
CST9
CUBN
CUGBP2
DAGLA
DEFB121
DNAJC17
DPCR1
DPP3
EBF4
EEF1B2
ELF1
ELN
EMR2
EMR3
EN1
ENTPD8
EP400
ERI1
ESRRB
FABP6
FAM150A
FAM169A
FAM180A
FAM193B
FBXL7
FHL5
FMN2
FNDC1
FOSB
FOXK1
FRMD8
GABRB3
GALNT9
GCET2
GFRA2
GIMAP2
GIMAP7
GMPS
GNG12
GPR123
GPR132
GPR56
GPX4
GTF2I
GYS1
GZMB
HAVCR2
HBBP1
HCG22
HDAC9
HGF
HIST1H2BJ
HIST1H3H
HIST1H4D
HIST2H2AA4
HLA-DPB2
HMGA2
HMGB2
HNRNPF
HOPX
HPYR1
HRNBP3
HSD17B14
IGDCC4
IGF1R
IGF2AS
IGFBP7
IL2
IL21R
INPP4B
ITGBL1
ITIH5
JAK3
JPH3
KBTBD2
KCNAB2
KCNG4
KCNIP1
KCNMA1
KCNN4
KCNQ2
KHDC1
KIAA0748
KIAA1217
KIAA1949
KIF6
KIR3DX1
KIRREL3
KLK12
KRT1
KRT83
LAIR1
LAMB3
LCE1C
LCP1
LCP2
LETMD1
LHFPL3
LILRA2
LILRB1
LINGO4
LOC100130987
LOC100132111
LOC100302652
LOC149134
LOC151658
LOC257358
LOC285375
LONRF1
LPCAT2
LRRC55
LUC7L3
LY9
MAB21L1
MAML2
MAZ
MC3R
MCC
ME3
MEF2C
MEG8
MEST
MIR138-1
MIR143
MIR19A
MIR21
MIR548F5
MIR585
MLC1
MMP9
MOG
MOSC1
MPO
MRAP2
MRC2
MRVI1
MS4A7
MUC12
MYOM2
MYT1L
NAT1
NAV3
NBEA
NCAPG
NCKAP1L
NCOA6
NLRP3
NME2
NOS1
NPFF
NPS
NRG4
NTF3
NTM
NTRK2
OBSL1
ODZ4
OR5B17
OR6P1
OVOL2
PAIP2
PARD6A
PARK2
PART1
PARVG
PCDH7
PCDHB11
PCDHB17
PCP4
PDE1A
PGLYRP4
PHC3
PHLDA2
PHLDB1
PIK3R6
PITPNM3
PLAC9
PLD5
PLEKHN1
PLK1
PNMAL2
POSTN
PPFIA4
PRDM16
PRDM6
PRKG1
PRR5L
PRTG
PRTN3
PTK2
PTK7
PTPRN2
PTTG1
RADIL
RAP1GAP2
RASD2
RASSF1
RBM17
RBM20
RBM24
RGMA
RGS17
RGS6
RGS9
RHOC
RIMBP2
RIN1
RPS6KC1
RRBP1
RRM2
RRS1
RTN2
S100A7L2
S100A8
SCLT1
SDCCAG8
SDK1
SEMA3B
SEMA5B
SF3B3
SFRP1
SGK1
SH2B3
SIGLEC12
SIGLEC14
SIK3
SIRPB2
SLC12A5
SLC16A1
SLC16A11
SLC22A20
SLC25A26
SLC33A1
SLC35E4
SLC39A12
SLC6A16
SLC9A9
SLIT2
SNORD115-37
SNORD93
SNRPN
SORBS3
SPRR1A
ST3GAL4
ST6GALNAC3
STEAP1
STK19
TACC1
TAGAP
TERC
TFEC
THAP11
TMEM132C
TMEM132D
TMEM206
TMEM67
TMEM71
TNFRSF10A
TNFRSF19
TNFSF14
TOMM20L
TOMM5
TOP2B
TRIOBP
TTLL10
UBR7
UBXN11
UVRAG
VARS
VIM
VPREB1
VPS41
VSTM1
WBSCR17
WDR51A
WFDC1
WIPF1
WNT7A
WNT7B
WSCD2
WWOX
XYLT1
YEATS4
YPEL3
ZBTB1
ZC3H12D
ZC3H4
ZCWPW1
ZDHHC13
ZMAT4
ZNF217
ZNF219
ZNF831
